# Supplementary material
Source: PubMed Central journal article supplement (PMC2532989)
Supplement: NIHMS62907-supplement-2File001.pdf [file NIHMS62907-supplement-2File001.pdf]

# Supporting Information

## Photoelectron Spectroscopy and Electronic Structure Calculations of $d^1$ Vanadocene Compounds with Chelated Dithiolate Ligands: Implications for Pyranopterin Mo/W Enzymes.

*Matthew A. Cranswick, Alice Dawson, J. Jon A. Cooney, Nadine E. Gruhn, Dennis L. Lichtenberger\*, John H. Enemark\**

Department of Chemistry, The University of Arizona, Tucson, AZ. 85721, USA.

[dlichten@email.arizona.edu](mailto:dlichten@email.arizona.edu), [jenemark@email.arizona.edu](mailto:jenemark@email.arizona.edu)

Table S1 – DFT optimized geometry for  $\text{Cp}_2\text{V}(\text{S}_2\text{C}_2\text{H}_2)$ .

Table S2 – DFT optimized geometry for  $\text{Cp}_2\text{V}(\text{bdt})$ .

Table S3 – DFT optimized geometry for  $\text{Cp}_2\text{Mo}(\text{bdt})$ .

Table S4 – Comparison of DFT geometry optimized structures of  $\text{Cp}_2\text{V}(\text{S}_2\text{C}_2\text{H}_2)$  and  $\text{Cp}_2\text{V}(\text{bdt})$  with crystallographic structures.

Table S5 – Orbital character for the valence orbitals calculated for  $\text{Cp}_2\text{V}(\text{S}_2\text{C}_2\text{H}_2)$  and  $\text{Cp}_2\text{V}(\text{bdt})$ .

Figure S1 – Potential energy diagram for neutral and cation states of  $\text{Cp}_2\text{V}(\text{S}_2\text{C}_2\text{H}_2)$ .

Figure S2 – Frozen solution EPR spectrum of  $\text{Cp}_2\text{V}(\text{S}_2\text{C}_2\text{H}_2)$ .

Figure S3 – UV-Vis/NIR of  $\text{Cp}_2\text{VCl}_2$  and  $\text{Cp}_2\text{V}(\text{S}_2\text{C}_2\text{H}_2)$ .

**Table S1.** DFT optimized geometry for  $\text{Cp}_2\text{V}(\text{S}_2\text{C}_2\text{H}_2)$ .

|   |           |           |           |
|---|-----------|-----------|-----------|
| V | 0.001552  | 0.018091  | 0.000000  |
| S | 1.793378  | 0.045752  | -1.582184 |
| S | 1.793378  | 0.045752  | 1.582184  |
| C | 3.047668  | 0.793674  | -0.678502 |
| C | 3.047668  | 0.793674  | 0.678502  |
| H | 3.890781  | 1.203876  | -1.238051 |
| H | 3.890781  | 1.203876  | 1.238051  |
| C | 0.324174  | 2.223067  | 0.000000  |
| C | -0.447026 | 1.914045  | -1.149459 |
| C | -0.447026 | 1.914045  | 1.149459  |
| C | -1.667722 | 1.384345  | -0.711858 |
| C | -1.667722 | 1.384345  | 0.711858  |
| H | 1.327977  | 2.627614  | 0.000000  |
| H | -0.144238 | 2.051282  | -2.179701 |
| H | -0.144238 | 2.051282  | 2.179701  |
| H | -2.470391 | 1.035808  | -1.352300 |
| H | -2.470391 | 1.035808  | 1.352300  |
| C | -1.772860 | -1.312949 | 0.000000  |
| C | -1.002616 | -1.613528 | -1.151149 |
| C | -1.002616 | -1.613528 | 1.151149  |
| C | 0.220292  | -2.161568 | -0.703073 |
| C | 0.220292  | -2.161568 | 0.703073  |
| H | -2.790381 | -0.943030 | 0.000000  |
| H | -1.306968 | -1.493197 | -2.185201 |
| H | -1.306968 | -1.493197 | 2.185201  |
| H | 1.031579  | -2.513727 | -1.326908 |
| H | 1.031579  | -2.513727 | 1.326908  |

**Table S2.** DFT optimized geometry for Cp<sub>2</sub>V(bdt).

|   |           |           |           |
|---|-----------|-----------|-----------|
| V | -0.021157 | 0.013544  | 0.000000  |
| S | 1.779173  | 0.060346  | -1.556333 |
| S | 1.779173  | 0.060346  | 1.556333  |
| C | 2.969454  | 0.992600  | -0.706007 |
| C | 2.969454  | 0.992600  | 0.706007  |
| C | 3.971279  | 1.687663  | -1.389245 |
| C | 3.971279  | 1.687663  | 1.389245  |
| C | 4.961877  | 2.359570  | -0.695474 |
| C | 4.961877  | 2.359570  | 0.695474  |
| H | 3.965519  | 1.688861  | -2.476092 |
| H | 3.965519  | 1.688861  | 2.476092  |
| H | 5.736571  | 2.890932  | -1.243013 |
| H | 5.736571  | 2.890932  | 1.243013  |
| C | 0.243961  | 2.250342  | 0.000000  |
| C | -0.513743 | 1.914241  | -1.147568 |
| C | -0.513743 | 1.914241  | 1.147568  |
| C | -1.716581 | 1.342212  | -0.712527 |
| C | -1.716581 | 1.342212  | 0.712527  |
| H | 1.228970  | 2.700883  | 0.000000  |
| H | -0.205830 | 2.051335  | -2.176414 |
| H | -0.205830 | 2.051335  | 2.176414  |
| H | -2.508708 | 0.972627  | -1.354261 |
| H | -2.508708 | 0.972627  | 1.354261  |
| C | -1.771159 | -1.368111 | 0.000000  |
| C | -0.993266 | -1.646703 | -1.149301 |
| C | -0.993266 | -1.646703 | 1.149301  |
| C | 0.247440  | -2.155213 | -0.703552 |
| C | 0.247440  | -2.155213 | 0.703552  |
| H | -2.795968 | -1.018902 | 0.000000  |
| H | -1.298677 | -1.525469 | -2.183100 |
| H | -1.298677 | -1.525469 | 2.183100  |
| H | 1.066258  | -2.488063 | -1.327606 |
| H | 1.066258  | -2.488063 | 1.327606  |

**Table S3.** DFT optimized geometry for Cp<sub>2</sub>Mo(bdt).

|    |           |           |           |
|----|-----------|-----------|-----------|
| Mo | 0.009454  | 0.031379  | 0.000000  |
| S  | 1.795749  | 0.148274  | -1.588752 |
| S  | 1.795749  | 0.148274  | 1.588752  |
| C  | 3.297905  | 0.110252  | -0.698528 |
| C  | 3.297905  | 0.110252  | 0.698528  |
| C  | 4.514639  | 0.095114  | -1.384424 |
| C  | 4.514639  | 0.095114  | 1.384424  |
| C  | 5.714692  | 0.080105  | -0.694284 |
| C  | 5.714692  | 0.080105  | 0.694284  |
| H  | 4.511493  | 0.094871  | -2.471884 |
| H  | 4.511493  | 0.094871  | 2.471884  |
| H  | 6.652628  | 0.066575  | -1.243958 |
| H  | 6.652628  | 0.066575  | 1.243958  |
| C  | 0.226041  | 2.282184  | 0.000000  |
| C  | -0.539714 | 1.951614  | -1.154124 |
| C  | -0.539714 | 1.951614  | 1.154124  |
| C  | -1.761284 | 1.416232  | -0.709444 |
| C  | -1.761284 | 1.416232  | 0.709444  |
| H  | 1.229331  | 2.690327  | 0.000000  |
| H  | -0.238851 | 2.100521  | -2.183990 |
| H  | -0.238851 | 2.100521  | 2.183990  |
| H  | -2.556271 | 1.045806  | -1.347617 |
| H  | -2.556271 | 1.045806  | 1.347617  |
| C  | -1.704368 | -1.419949 | 0.000000  |
| C  | -0.920196 | -1.697092 | -1.160262 |
| C  | -0.920196 | -1.697092 | 1.160262  |
| C  | 0.309780  | -2.231775 | -0.699211 |
| C  | 0.309780  | -2.231775 | 0.699211  |
| H  | -2.736243 | -1.093445 | 0.000000  |
| H  | -1.233894 | -1.622398 | -2.195065 |
| H  | -1.233894 | -1.622398 | 2.195065  |
| H  | 1.146963  | -2.528733 | -1.319638 |
| H  | 1.146963  | -2.528733 | 1.319638  |

**Table S4.** Comparison of unrestricted,  $C_s$  symmetry geometry optimized molecular structures of  $Cp_2V(S_2C_2H_2)$  and  $Cp_2V(bdt)$  with crystallographic structures.<sup>a</sup>

| $Cp_2V(S_2C_2H_2)$ |                                  |                                            |
|--------------------|----------------------------------|--------------------------------------------|
|                    | Calculated                       | Experimental                               |
| $Cp_{C-C}$         | 1.401-1.424 (1.413) <sup>b</sup> | 1.394-1.407 (1.399)                        |
| M- $Cp_c$          | 2.220-2.300 (2.259)              | 2.282-2.338 (2.302)                        |
| M-S                | 2.391                            | 2.437, 2.412                               |
| S-C                | 1.718                            | 1.757, 1.742                               |
| C-C                | 1.357                            | 1.330                                      |
| S-M-S              | 82.9°                            | 81.1°                                      |
| $Cp_2V(bdt)^c$     |                                  |                                            |
|                    | Calculated                       | Experimental                               |
| $Cp_{C-C}$         | 1.401-1.425 (1.412)              | 1.322-1.422 (1.371)<br>1.293-1.445 (1.367) |
| M- $Cp_c$          | 2.242-2.298 (2.265)              | 2.273-2.308 (2.300)<br>2.287-2.343 (2.310) |
| M-S                | 2.379                            | 2.428, 2.435<br>2.432, 2.427               |
| S-C                | 1.735                            | 1.699, 1.776<br>1.727, 1.782               |
| C-C <sup>d</sup>   | 1.412                            | 1.406, 1.401                               |
| S-M-S              | 81.7°                            | 79.7°, 79.9°                               |

<sup>a</sup>: All distances are given in Å, <sup>b</sup>: average distance, <sup>c</sup>: crystallographic data taken from Stephan *et al.*<sup>24</sup> <sup>d</sup>: C-C distances are for M-S-C-C-S metallocycle.

**Table S5.** Orbital character (%) for the valence orbitals calculated for Cp<sub>2</sub>V(S<sub>2</sub>C<sub>2</sub>H<sub>2</sub>) and Cp<sub>2</sub>V(bdt).

| Orbital           | Character                       | Cp <sub>2</sub> V(S <sub>2</sub> C <sub>2</sub> H <sub>2</sub> ) |       | Cp <sub>2</sub> V(bdt) |       |
|-------------------|---------------------------------|------------------------------------------------------------------|-------|------------------------|-------|
|                   |                                 | Alpha                                                            | beta  | alpha                  | beta  |
| SOMO <sup>a</sup> | V 3d <sub>z2</sub>              | 23.67                                                            | 45.33 | 27.78                  | 53.57 |
|                   | S 3p                            | 47.24                                                            | 26.36 | 43.63                  | 16.61 |
|                   | C <sub>α</sub> 2p <sup>b</sup>  | 16.7                                                             | 9.14  | 6.67                   | 1.97  |
|                   | C <sub>Cp</sub> 2p <sup>c</sup> | 6.61                                                             | 11.21 | 5.18                   | 11.83 |
|                   | C <sub>other</sub> <sup>d</sup> | n/a                                                              | n/a   | 12.3                   | 4.59  |
| HOMO              | V 3d <sub>z2</sub>              | 55.45                                                            | 25.6  | <1                     | 16.68 |
|                   | S 3p                            | 16.66                                                            | 38.6  | 64.94                  | 44.89 |
|                   | C <sub>α</sub> 2p               | 7.65                                                             | 15.46 | <1                     | 9.67  |
|                   | C <sub>Cp</sub> 2p              | 8.82                                                             | 10.17 | 4.65                   | 9.62  |
|                   | C <sub>other</sub>              | n/a                                                              | n/a   | 21.84                  | 8.84  |
| HOMO-1            | V 3d <sub>z2</sub>              | 4.46                                                             | 3.66  | 52.25                  | <1    |
|                   | S 3p                            | 70.81                                                            | 71.52 | 18.42                  | 65.89 |
|                   | C <sub>α</sub> 2p               | 9.71                                                             | 10.29 | 5.51                   | <1    |
|                   | C <sub>Cp</sub> 2p              | 11.03                                                            | 9.69  | 7.95                   | 6.8   |
|                   | C <sub>other</sub>              | n/a                                                              | n/a   | 3.87                   | 22.25 |

*a:* The beta spin in the SOMO is a vacant orbital. *b:* C<sub>α</sub> are the carbon atoms in the M-S-C-C-S metallocycle. *c:* C<sub>Cp</sub> includes all Cp carbon atoms. *d:* C<sub>other</sub> includes all remaining carbon atoms.

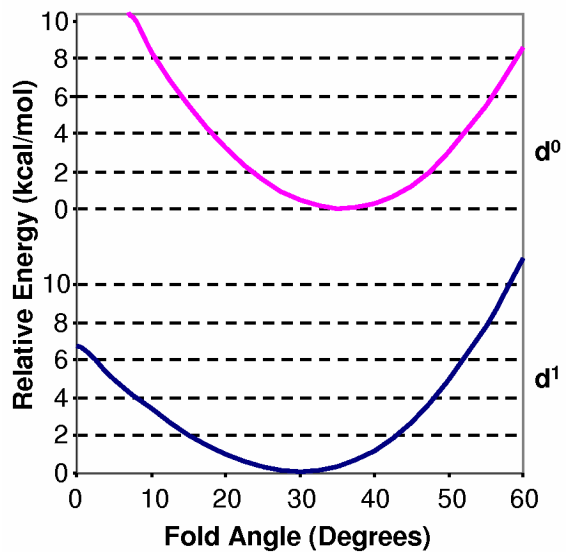

**Figure S1.** Potential energy curves showing the calculated total energy with change in fold angle for the neutral and cation of  $\text{Cp}_2\text{V}(\text{edt})$ .

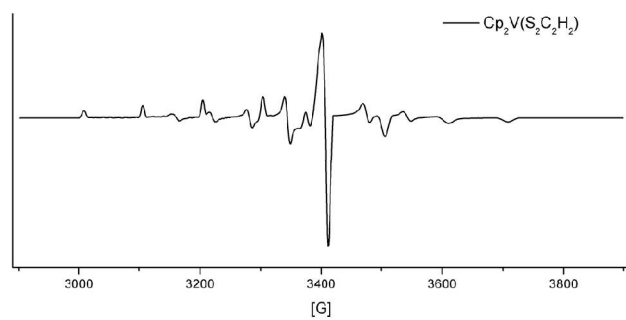

**Figure S2.** Frozen solution EPR spectrum of  $\text{Cp}_2\text{V}(\text{S}_2\text{C}_2\text{H}_2)$  showing single electron localized on vanadium.



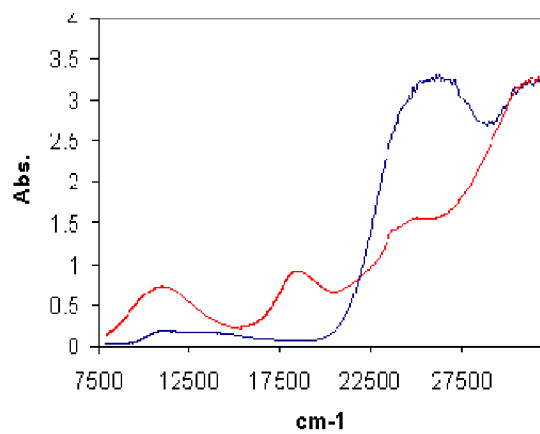

**Figure S3.** UV-Vis/NIR of  $\text{Cp}_2\text{VCl}_2$  (blue) and  $\text{Cp}_2\text{V}(\text{S}_2\text{C}_2\text{H}_2)$  (red).
